# Supplementary material for: An update and frequency distribution of Y chromosome haplogroups in modern Japanese males
Source: Springer Nature journal article supplement (doi:10.1038/s10038-023-01214-5), 2023-12-21
Supplement: 10038_2023_1214_MOESM2_ESM.pdf [file 10038_2023_1214_MOESM2_ESM.pdf]

Supplementary Table S1: Summary of primer sets, PCR annealing temperatures, and methods used for Y chromosome haplogroup C lineage genotyping

| Haplogroup | Marker  | Primer sequence                                       | Annealing temp. °C | Method   | Restriction enzyme |
|------------|---------|-------------------------------------------------------|--------------------|----------|--------------------|
| C1a1a      | P121    | GGTTTTAGACCAAACGGGCA<br>GCTTCTGAGATGCCTCCACTA         | 60                 | Sequesce |                    |
| C1a1a1     | CTS9336 | ACAGGCCAAAACCTCCTGTG<br>TGCCCCTGTTACTCTCTCCA          | 60                 | Sequesce |                    |
| C1a1a1a    | Z7643   | GCTGCCAAGCAGTTGGATCT<br>CTGTGTCTTCTACTACAGCATGTGG     | 60                 | RFLP     | XmnI               |
| C1a1a1b    | Z7228   | GCTGCAGGAAAGCGTGATAG<br>GCTTCGTACCCAGTGTTGG           | 60                 | RFLP     | BglI               |
| C1a1a2~    | Z45461  | CAGGCTTATGCTTGGAGCAC<br>AGAAAAGTGTGCCGACCTGC          | 60                 | Sequesce |                    |
| C2a        | F1396   | ATCACCACAGAGTGTTCCTCA<br>CAGTGAAAAGAAAACACTCACTGCAT   | 60                 | Sequesce |                    |
| C2b        | F1067   | ATCACAAAGGTGCTCAGCCA<br>GTGGAACAAGCAGCTAAGC           | 60                 | Sequesce |                    |
| C2b1       | CTS3297 | TCCTAGGGTATTCTTACGACAGAACC<br>AGGTAAGTAACCAGCCACCTTCA | 60                 | RFLP     | TaqI               |
| C2b1a      | F3895   | TGTGAGAACACTGCACCACC<br>AGGCCTGAGTCCTTGAGTCT          | 61                 | RFLP     | TaqI               |
| C2b1a1     | F3755   | CGGGACATGGTGTAGACTGC<br>GAAGAGCTCCTGCCAAATCCCT        | 60                 | RFLP     | EciI               |
| C2b1a1a    | F3967   | AAGCTCTGGGTTGGCAAAGT<br>TGACTGACCCTCATTGC             | 61                 | RFLP     | CviQI              |
| C2b1a1b    | A14898  | TCAGCAAGTTAGAGTAAATGCCG<br>AGACTATAGAGTTACCAAGCCACT   | 60                 | Sequesce |                    |
| C2b1a2     | F3880   | TCACAGACATTGAAGTTGAGTGC<br>GGGTGTTTACCTTTCCTTCAGATG   | 60                 | RFLP     | HindIII            |
| C2b1b      | Z12264  | GGTCTAGGAGCCAACGGATG<br>CAGGAACCCTGAGGAAGCAG          | 60                 | RFLP     | Hpy188III          |

RFLP:reaction-r RFLP:reaction-restriction-fragment length polymorphisms
