# Supplementary material for: An update and frequency distribution of Y chromosome haplogroups in modern Japanese males
Source: Springer Nature journal article supplement (doi:10.1038/s10038-023-01214-5), 2023-12-21
Supplement: 10038_2023_1214_MOESM3_ESM.pdf [file 10038_2023_1214_MOESM3_ESM.pdf]

Supplementary Table S2: Summary of primer sets, PCR annealing temperatures, and methods used for Y chromosome haplogroup D lineage genotyping

| Haplogroup      | Marker        | Primer sequence                                      | Annealing temp. °C | Method   | Restriction enzyme |
|-----------------|---------------|------------------------------------------------------|--------------------|----------|--------------------|
| D1a2a1          | M116.1        | AGTTGCATACCATTTCAGTCAC<br>CAGCTTCTCTAACCGCTCCAA      | 60                 | RFLP     | EcoRV              |
| D1a2a1a         | CTS10536      | GCTCTTGGCAACCTGAAAGA<br>CAGGATGGAGCCCTTGAAG          | 60                 | RFLP     | HpyCH4III          |
| D1a2a1b~        | P120          | GCTAGATGTGAGAGGAAAGGAG<br>CCCATTTGTTTCAGAAGACTGAC    | 60                 | Sequesce |                    |
| D1a2a1c         | CTS6609^^     | AAGGAGGAAGAACCTGGTCTCTAC<br>AAACCATGTGTACCCACTGAGAAC | 61                 | RFLP     | DraI               |
| D1a2a1c1        | CTS3097       | TGGGGACTTTGGAAACCCAG<br>CTGGGAAACAAAAGGGCAGC         | 64                 | RFLP     | HpyCH4IV           |
| D1a2a1c1a~      | CTS1670       | GCAGGAGGCCATATTGAAGTCC<br>CCTTCTAGGGATGGTTAGCTTCT    | 64                 | RFLP     | DdeI               |
| D1a2a1c1a1      | CTS2378       | CCAACTCCCACGCTCATCTT<br>TAGACTCTGCACAACCTGCC         | 64                 | RFLP     | HpyCH4IV           |
| D1a2a1c1a1a     | V1017         | TAGGCCTTGAATCATGCAGTGTG<br>TCCCTGCATAACTGACGTCCC     | 60                 | RFLP     | BsII               |
| D1a2a1c1a1b     | CTS3033       | TTGTATAAGGTGCACGGAAGCAG<br>GCACGGAGGTCTGAAATCAAGG    | 61                 | Sequesce |                    |
| D1a2a1c1a1b1~   | Z40684        |                                                      |                    | TaqMan   |                    |
| D1a2a1c1a1c~    | M151          | ACCCATGACGGTGGAAACATTT<br>ACAAGAGGGTTGATCCAGACAG     | 60                 | Sequesce |                    |
| D1a2a1c1a2~     | F8521.3       | AGGCTGTAGCTGCTTATGACC<br>TGGGTAACACCTTGGCTGAG        | 60                 | Sequesce |                    |
| D1a2a1c1b       | BY170998      |                                                      |                    | TaqMan   |                    |
| D1a2a1c1b1      | BY169287      |                                                      |                    | TaqMan   |                    |
| D1a2a1c1c       | Z30648        | CCTCAAAGCTCAGGTTGCAAG<br>TTTGGCGAGCATCTACATTCC       | 64                 | RFLP     | Acil               |
| D1a2a1c2        | CTS10304      | CTTTCTCAATTGCCAAGCTTTGGG<br>ATCCTGCCTATAGCTGAACTTGAC | 60                 | RFLP     | AvaII              |
| D1a2a2          | Z1519         | TCAGACTGCCTTTGTCATGGTTC<br>CTTGTCACTAGGCAAGTTGGCATT  | 60                 | RFLP     | TaqI               |
| D1a2a1a2        | IMS-JST022457 | CCGTCTACGTGTAGGACCTC<br>TGGCATGCAGTCATTCAAAGG        | 64                 | RFLP     | XmnI               |
| D1a2a1a2b       | IMS-JST006841 | GACCCTGAGTTGTTGGACCC<br>CAGCAAGCACTGATGCCTGT         | 64                 | RFLP     | Acil               |
| D1a2a1a2b1      | Z3611         | TGAGTGTCTTTCTTTCTAAATACTGGC<br>CAGCCAGCCTACTCGAAGTC  | 62                 | RFLP     | ApoI               |
| D1a2a1a2b1a1    | Z1504         |                                                      |                    | TaqMan   |                    |
| D1a2a1a2b1a1a   | CTS8093       |                                                      |                    | TaqMan   |                    |
| D1a2a1a2b1a1a1  | FGC6373       |                                                      |                    | TaqMan   |                    |
| D1a2a1a2b1a1a1a | L137.3        |                                                      |                    | TaqMan   |                    |
| D1a2a1a2b1a1a1b | BY13984       | TCCAACGCTAAAGGCTGACAT<br>AAGCCTACCTGCAAGCTTCTC       | 60                 | RFLP     | Bsrl               |
| D1a2a1a2b1a1a3  | Z46274        | TCCCAGAAAGCAGAGCAGTG<br>AGGAGAGCTGAAGGGTAGCA         | 60                 | RFLP     | PmlI               |
| D1a2a1a2b1a1a9  | Z40687        |                                                      |                    | TaqMan   |                    |
| D1a2a1a2b1a1b   | BY141272      |                                                      |                    | TaqMan   |                    |
| D1a2a1a3        | CTS10972      | ACCTTTTTTCATCTCCCCAGTC<br>AGTTGTTACCCACCTCCT         |                    | RFLP     | MlyI               |

RFLP:reaction-restriction-fragment length polymorphisms
