# Supplementary material for: An update and frequency distribution of Y chromosome haplogroups in modern Japanese males
Source: Springer Nature journal article supplement (doi:10.1038/s10038-023-01214-5), 2023-12-21
Supplement: 10038_2023_1214_MOESM4_ESM.pdf [file 10038_2023_1214_MOESM4_ESM.pdf]

Supplementary Table S3: Summary of primer sets, PCR annealing temperatures, and methods used for Y chromosome haplogroup O lineage genotyping

| Haplogroup   | Marker  | Primer sequence                                           | Annealing temp. °C | Method   | Restriction enzyme |
|--------------|---------|-----------------------------------------------------------|--------------------|----------|--------------------|
| O1b2a        | F1942   | CATATGTGCAGCCCTAAAATGTCA<br>TGAATGGCTACCAATACCCC          | 60                 | Sequesce |                    |
| O1b2a1       | CTS9259 | GCCAAGGACCAGAGGGAATC<br>TCCACAGGGTTTTCCAGAGC              | 62                 | RFLP     | HinI               |
| O1b2a1a      | F1290   | GTCCCAACCTTTTGCTTGCC<br>CATGGTGCGAAGCTGCTTG               | 60                 | Sequesce |                    |
| O1b2a1a2     | F2868   | TGTCCAGTTCAGCAACGAGG<br>TGGGAACAGTCCCATAGGTTG             | 60                 | Sequesce |                    |
| O1b2a1a2a    | K28     | GCATCTATTGGCTAAGTCTACATATGA<br>GGCATCCAAATGATAAGACATTCTTC | 62                 | RFLP     | HinI               |
| O1b2a1a2a1   | CTS723  | TGCATTATGGACTAGAGCCTCTTC<br>CTCTCATTTCCTTTGAGCAGTCAG      | 60                 | RFLP     | HinI               |
| O1b2a1a2a1a  | CTS7620 |                                                           |                    | TaqMan   |                    |
| O1b2a1a2a1b  | A12447  | AGGTTTTTAGCAGTGAATGCCAC<br>AGAAAGTGCTAGTGCCGAGA           | 62                 | RFLP     | AciI               |
| O1b2a1a2a1b1 | PH40    | GGATGGGGTCGGAACAGAAG<br>GGCATCAGGGAGAAGGTGAC              | 64                 | RFLP     | XmnI               |
| O1b2a1a3     | F3821   |                                                           |                    | TaqMan   |                    |
| O1b2a1b      | CTS562  | TGTGCGTCTTTAGTGTCTGC<br>AACTGCTCACGAGGCTGAAG              | 60                 | RFLP     | SspI               |
| O1b2a1a1a    | CTS7465 | AGAAAAGCATGCAGAGGGCT<br>TGGTAGCAGTCAAAGCCAGG              | 60                 | RFLP     | EcoRV              |
| O1b2a1a1b    | Z24598  | ATCCAGGTACCCAGCTCGTT<br>TCAGACAGCAATGGGACGAGA             | 60                 | RFLP     | BcnI               |
| O1b2a1a1c    | CTS6622 |                                                           |                    | TaqMan   |                    |

RFLP:reaction-restriction-fragment length polymorphisms
