# Supplementary material for: An update and frequency distribution of Y chromosome haplogroups in modern Japanese males
Source: Springer Nature journal article supplement (doi:10.1038/s10038-023-01214-5), 2023-12-21
Supplement: 10038_2023_1214_MOESM5_ESM.pdf [file 10038_2023_1214_MOESM5_ESM.pdf]

Supplementary Table S4: Number and frequency of Y chromosome haplogroup C1a1 and C2 lineages in Japanese male population from the seven cities

| <b>C1a1</b>     | Nagasaki | Fukuoka   | Tokushima | Osaka    | Kanazawa  | Kawaski   | Sapporo   | All (%)   |
|-----------------|----------|-----------|-----------|----------|-----------|-----------|-----------|-----------|
| C1a1a-P121      | 1 (10.0) | 0 (0.0)   | 0 (0.0)   | 0 (0.0)  | 0 (0.0)   | 0 (0.0)   | 1 (4.8)   | 2 (1.8)   |
| C1a1a1-CTS9336  | 0 (0.0)  | 0 (0.0)   | 0 (0.0)   | 0 (0.0)  | 0 (0.0)   | 0 (0.0)   | 0 (0.0)   | 0 (0.0)   |
| C1a1a1a-Z7643   | 9 (90.0) | 6 (100.0) | 13 (56.5) | 6 (54.5) | 18 (90.0) | 15 (78.9) | 14 (66.7) | 81 (73.6) |
| C1a1a1b-CTS7228 | 0 (0.0)  | 0 (0.0)   | 10 (43.5) | 5 (45.5) | 2 (10.0)  | 4 (21.1)  | 6 (28.6)  | 27 (24.5) |
| <b>Total</b>    | 10       | 6         | 23        | 11       | 20        | 19        | 21        | 110       |
| <hr/>           |          |           |           |          |           |           |           |           |
| <b>C2</b>       |          |           |           |          |           |           |           |           |
| C2a-F1396       | 1 (6.7)  | 0 (0.0)   | 2 (11.8)  | 3 (42.9) | 5 (15.6)  | 2 (9.5)   | 6 (20.0)  | 19 (14.6) |
| C2b1-CTS3297    | 0 (0.0)  | 0 (0.0)   | 0 (0.0)   | 0 (0.0)  | 0 (0.0)   | 0 (0.0)   | 1 (3.3)   | 1 (0.8)   |
| C2b1a1a-F3967   | 8 (53.3) | 4 (50.0)  | 6 (35.3)  | 0 (0.0)  | 11 (34.4) | 10 (47.6) | 9 (30.0)  | 48 (36.9) |
| C2b1a1b-A14898  | 0 (0.0)  | 0 (0.0)   | 2 (11.8)  | 1 (14.3) | 1 (3.1)   | 0 (0.0)   | 2 (6.7)   | 6 (4.6)   |
| C2b1a2-F3880    | 2 (13.3) | 2 (25.0)  | 2 (11.8)  | 3 (42.9) | 12 (37.5) | 4 (19.0)  | 7 (23.3)  | 32 (24.6) |
| C2b1b-Z12264    | 4 (26.7) | 2 (25.0)  | 5 (29.4)  | 0 (0.0)  | 3 (9.4)   | 5 (23.8)  | 5 (16.7)  | 24 (18.5) |
| <b>Total</b>    | 15       | 8         | 17        | 7        | 32        | 21        | 30        | 130       |
