# Supplementary material for: An update and frequency distribution of Y chromosome haplogroups in modern Japanese males
Source: Springer Nature journal article supplement (doi:10.1038/s10038-023-01214-5), 2023-12-21
Supplement: 10038_2023_1214_MOESM6_ESM.pdf [file 10038_2023_1214_MOESM6_ESM.pdf]

Supplementary Table S5: Number and frequency of Y chromosome haplogroup D1a2a and D1a2a (12f2b) lineages in Japanese male population from the seven cities

| <b>D1a2a</b>            | Nagasaki  | Fukuoka   | Tokushima | Osaka     | Kanazawa  | Kawaski   | Sapporo   | All (%)    |
|-------------------------|-----------|-----------|-----------|-----------|-----------|-----------|-----------|------------|
| D1a2a-M55               | 1 (2.9)   | 0 (0.0)   | 1 (3.0)   | 0 (0.0)   | 0 (0.0)   | 1 (1.7)   | 0 (0.0)   | 3 (0.9)    |
| D1a2a1-M116.1           | 0 (0.0)   | 0 (0.0)   | 0 (0.0)   | 1 (5.6)   | 0 (0.0)   | 0 (0.0)   | 0 (0.0)   | 1 (0.3)    |
| D1a2a1c-CTS6609^^       | 1 (2.9)   | 0 (0.0)   | 1 (3.0)   | 0 (0.0)   | 3 (3.8)   | 1 (1.7)   | 1 (1.3)   | 7 (2.2)    |
| D1a2a1c1-CTS3097        | 3 (8.8)   | 3 (17.6)  | 1 (3.0)   | 0 (0.0)   | 2 (2.6)   | 2 (3.4)   | 2 (2.6)   | 13 (4.1)   |
| D1a2a1c1a-CTS1670       | 1 (2.9)   | 1 (5.9)   | 2 (6.1)   | 1 (5.6)   | 7 (9.0)   | 10 (17.2) | 6 (7.7)   | 28 (8.9)   |
| D1a2a1c1a1-CTS2378      | 0 (0.0)   | 2 (11.8)  | 0 (0.0)   | 0 (0.0)   | 2 (2.6)   | 3 (5.2)   | 8 (10.3)  | 15 (4.7)   |
| D1a2a1c1a1a-V1017       | 2 (5.9)   | 0 (0.0)   | 0 (0.0)   | 1 (5.6)   | 3 (3.8)   | 3 (5.2)   | 2 (2.6)   | 11 (3.5)   |
| D1a2a1c1a1b-CTS3033     | 1 (2.9)   | 1 (5.9)   | 0 (0.0)   | 0 (0.0)   | 2 (2.6)   | 1 (1.7)   | 1 (1.3)   | 6 (1.9)    |
| D1a2a1c1a1b1~-Z40684    | 7 (20.6)  | 5 (29.4)  | 5 (15.2)  | 2 (11.1)  | 17 (21.8) | 10 (17.2) | 14 (17.9) | 60 (19.0)  |
| D1a2a1c1b-BY170998      | 1 (2.9)   | 1 (5.9)   | 0 (0.0)   | 0 (0.0)   | 0 (0.0)   | 1 (1.7)   | 1 (1.3)   | 4 (1.3)    |
| D1a2a1c1b1-BY169287     | 3 (8.8)   | 0 (0.0)   | 3 (9.1)   | 2 (11.1)  | 6 (7.7)   | 4 (6.9)   | 9 (11.5)  | 27 (8.5)   |
| D1a2a1c1c-Z30648        | 4 (11.8)  | 0 (0.0)   | 2 (6.1)   | 1 (5.6)   | 5 (6.4)   | 4 (6.9)   | 5 (6.4)   | 21 (6.6)   |
| D1a2a1c2-CTS10304       | 5 (14.7)  | 0 (0.0)   | 3 (9.1)   | 0 (0.0)   | 5 (6.4)   | 1 (1.7)   | 4 (5.1)   | 18 (5.7)   |
| D1a2a2-Z1519            | 5 (14.7)  | 4 (23.5)  | 15 (45.5) | 10 (55.6) | 26 (33.3) | 17 (29.3) | 25 (32.1) | 102 (32.3) |
| <b>Total</b>            | <b>34</b> | <b>17</b> | <b>33</b> | <b>18</b> | <b>78</b> | <b>58</b> | <b>78</b> | <b>316</b> |
| <hr/>                   |           |           |           |           |           |           |           |            |
| <b>D1a2a-12f2b</b>      |           |           |           |           |           |           |           |            |
| D1a2a1a2b-IMS-JST006841 | 4 (7.5)   | 1 (6.3)   | 11 (20.0) | 2 (7.1)   | 16 (17.6) | 5 (11.4)  | 10 (10.8) | 49 (12.9)  |
| D1a2a1a2b1-Z3611        | 0 (0.0)   | 0 (0.0)   | 0 (0.0)   | 0 (0.0)   | 0 (0.0)   | 1 (2.3)   | 1 (1.1)   | 2 (0.5)    |
| D1a2a1a2b1a-Z3651       | 0 (0.0)   | 0 (0.0)   | 1 (1.8)   | 1 (3.6)   | 1 (1.1)   | 2 (4.5)   | 1 (1.1)   | 6 (1.6)    |
| D1a2a1a2b1a1-Z1504      | 6 (11.3)  | 1 (6.3)   | 3 (5.5)   | 4 (14.3)  | 4 (4.4)   | 1 (2.3)   | 7 (7.5)   | 26 (6.8)   |
| D1a2a1a2b1a1a-CTS8093   | 12 (22.6) | 3 (18.8)  | 14 (25.5) | 9 (32.1)  | 20 (22.0) | 5 (11.4)  | 17 (18.3) | 80 (21.1)  |
| D1a2a1a2b1a1a1-FGC6373  | 9 (17.0)  | 5 (31.3)  | 6 (10.9)  | 5 (17.9)  | 13 (14.3) | 8 (18.2)  | 14 (15.1) | 60 (15.8)  |
| D1a2a1a2b1a1a1a-L137.3  | 10 (18.9) | 1 (6.3)   | 8 (14.5)  | 3 (10.7)  | 12 (13.2) | 7 (15.9)  | 11 (11.8) | 52 (13.7)  |
| D1a2a1a2b1a1a3-Z46274   | 3 (5.7)   | 2 (12.5)  | 6 (10.9)  | 1 (3.6)   | 3 (3.3)   | 5 (11.4)  | 9 (9.7)   | 29 (7.6)   |
| D1a2a1a2b1a1a9-Z40687   | 3 (5.7)   | 2 (12.5)  | 1 (1.8)   | 1 (3.6)   | 3 (3.3)   | 1 (2.3)   | 5 (5.4)   | 16 (4.2)   |
| D1a2a1a2b1a1b-BY141272  | 1 (1.9)   | 0 (0.0)   | 1 (1.8)   | 0 (0.0)   | 2 (2.2)   | 3 (6.8)   | 2 (2.2)   | 9 (2.4)    |
| D1a2a1a3-CTS10972       | 5 (9.4)   | 1 (6.3)   | 4 (7.3)   | 2 (7.1)   | 17 (18.7) | 6 (13.6)  | 16 (17.2) | 51 (13.4)  |
| <b>Total</b>            | <b>53</b> | <b>16</b> | <b>55</b> | <b>28</b> | <b>91</b> | <b>44</b> | <b>93</b> | <b>380</b> |
