# Supplementary material for: An update and frequency distribution of Y chromosome haplogroups in modern Japanese males
Source: Springer Nature journal article supplement (doi:10.1038/s10038-023-01214-5), 2023-12-21
Supplement: 10038_2023_1214_MOESM7_ESM.pdf [file 10038_2023_1214_MOESM7_ESM.pdf]

Supplementary Table S6: Number and frequency of Y chromosome haplogroup O1b2 and O1b2a1a1 lineages in Japanese male population from the seven cities

| <b>O1b2</b>         | Nagasaki  | Fukuoka   | Tokushima | Osaka     | Kanazawa   | Kawasaki  | Sapporo    | All        |
|---------------------|-----------|-----------|-----------|-----------|------------|-----------|------------|------------|
| O1b2-SRY465         | 0 (0.0)   | 0 (0.0)   | 1 (3.0)   | 1 (6.7)   | 6 (11.1)   | 1 (3.2)   | 5 (12.2)   | 14 (6.5)   |
| O1b2a-F1942         | 2 (6.3)   | 0 (0.0)   | 1 (3.0)   | 0         | 3 (5.6)    | 2 (6.5)   | 2 (4.9)    | 10 (4.7)   |
| O1b2a1a-F1290       | 0 (0.0)   | 0 (0.0)   | 1 (3.0)   | 1 (6.7)   | 3 (5.6)    | 5 (16.1)  | 0 (0.0)    | 10 (4.7)   |
| O1b2a1a2a-K28       | 1 (3.1)   | 0 (0.0)   | 0 (0.0)   | 0 (0.0)   | 0 (0.0)    | 0 (0.0)   | 0 (0.0)    | 1 (0.5)    |
| O1b2a1a2a1-CTS723   | 10 (31.3) | 3 (37.5)  | 8 (24.2)  | 3 (20.0)  | 9 (16.7)   | 8 (25.8)  | 11 (26.8)  | 52 (24.3)  |
| O1b2a1a2a1a-CTS7620 | 8 (25.0)  | 3 (37.5)  | 11 (33.3) | 7 (46.7)  | 15 (27.8)  | 5 (16.1)  | 11 (26.8)  | 60 (28.0)  |
| O1b2a1a2a1b-A12447  | 0 (0.0)   | 0 (0.0)   | 0 (0.0)   | 0 (0.0)   | 0 (0.0)    | 0 (0.0)   | 1 (2.4)    | 1 (0.5)    |
| O1b2a1a2a1b1-PH40   | 8 (25.0)  | 1 (12.5)  | 7 (21.2)  | 1 (6.7)   | 3 (5.6)    | 5 (16.1)  | 5 (12.2)   | 30 (14.0)  |
| O1b2a1a3-F3821      | 3 (9.4)   | 1 (12.5)  | 4 (12.1)  | 2 (13.3)  | 15 (27.8)  | 5 (16.1)  | 5 (12.2)   | 35 (16.4)  |
| O1b2a1b-CTS562      | 0 (0.0)   | 0 (0.0)   | 0 (0.0)   | 0 (0.0)   | 0 (0.0)    | 0 (0.0)   | 1 (2.4)    | 1 (0.5)    |
| <b>Total</b>        | <b>32</b> | <b>8</b>  | <b>33</b> | <b>15</b> | <b>54</b>  | <b>31</b> | <b>41</b>  | <b>214</b> |
| <hr/>               |           |           |           |           |            |           |            |            |
| <b>O1b2a1a1</b>     |           |           |           |           |            |           |            |            |
| O1b2a1a1-47z        | 24 (34.8) | 8 (29.6)  | 28 (38.4) | 5 (19.2)  | 29 (27.9)  | 26 (33.3) | 34 (30.1)  | 154 (31.4) |
| O1b2a1a1a-CTS7465   | 23 (33.3) | 9 (33.3)  | 25 (34.2) | 9 (34.6)  | 35 (33.7)  | 23 (29.5) | 44 (38.9)  | 168 (34.3) |
| O1b2a1a1b-Z24598    | 15 (21.7) | 7 (25.9)  | 14 (19.2) | 9 (34.6)  | 29 (27.9)  | 16 (20.5) | 27 (23.9)  | 117 (23.9) |
| O1b2a1a1c-CTS6622   | 7 (10.1)  | 3 (11.1)  | 6 (8.2)   | 3 (11.5)  | 11 (10.6)  | 13 (16.7) | 8 (7.1)    | 51 (10.4)  |
| <b>Total</b>        | <b>69</b> | <b>27</b> | <b>73</b> | <b>26</b> | <b>104</b> | <b>78</b> | <b>113</b> | <b>490</b> |
