# Supplementary figures and images for: An update and frequency distribution of Y chromosome haplogroups in modern Japanese males
Source: Springer Nature journal article supplement (doi:10.1038/s10038-023-01214-5), 2023-12-21

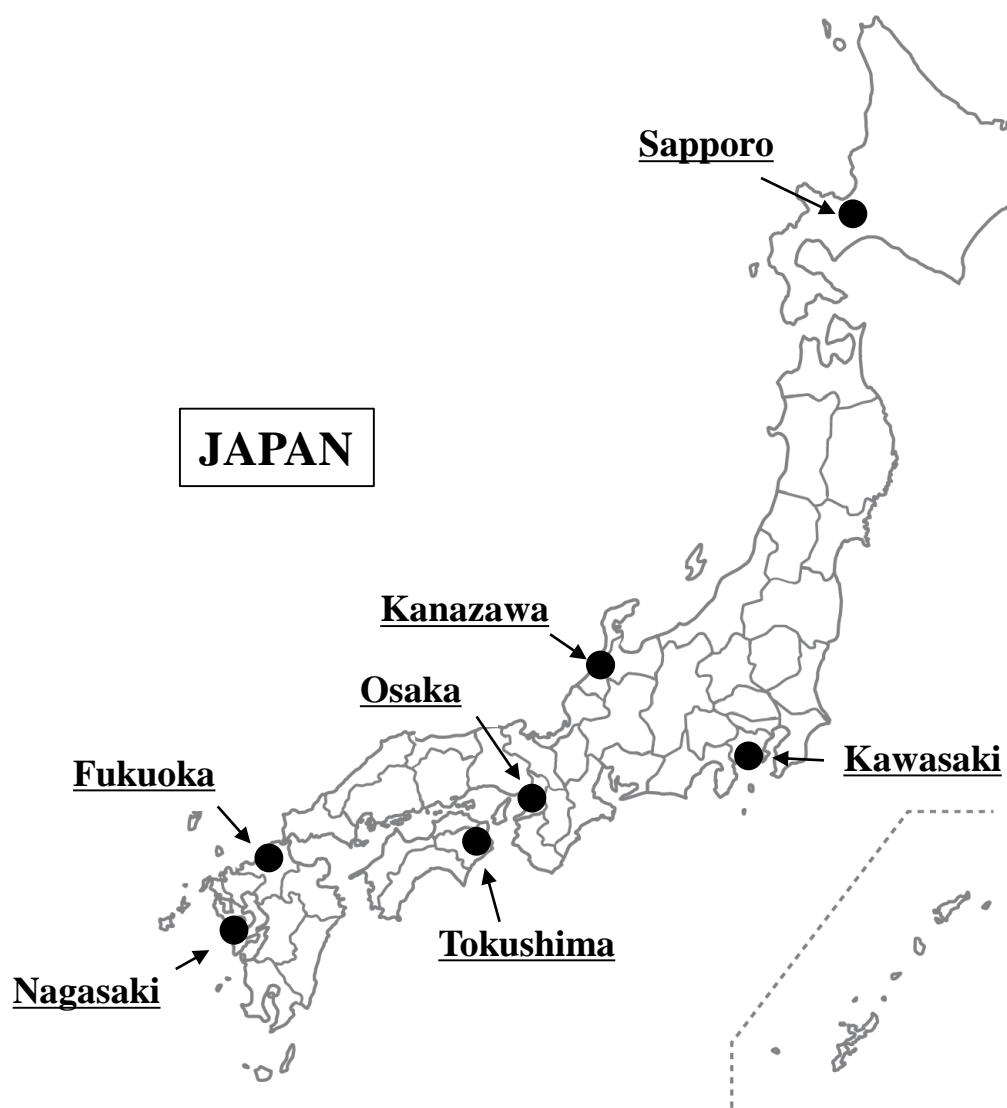

Supplementary Figure S1. Geographic locations of Japanese men examined in this study.

Supplement: 10038_2023_1214_MOESM1_ESM.pdf [file 10038_2023_1214_MOESM1_ESM.pdf]
